# Supplementary material
Source: PubMed Central journal article supplement (PMC9192130)
Supplement: mmc1.pdf [file mmc1.pdf]

## Supplemental Figure S1

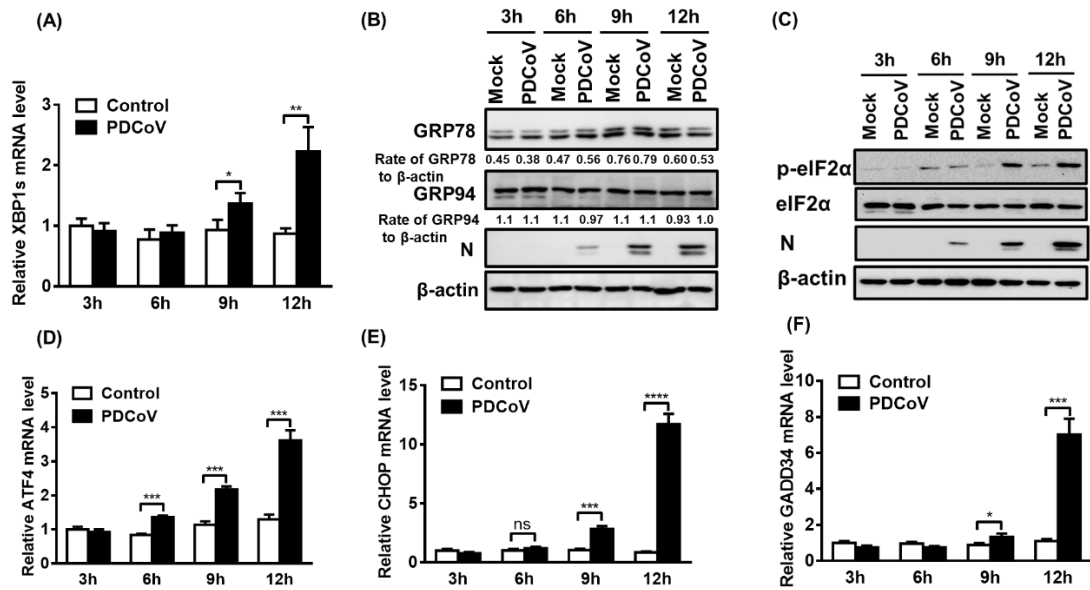

**Figure S1. Activation state of three UPR pathways in PDCoV-infected IPI-2I cells.**

(A–F) IPI-2I cells were mock-infected or infected with PDCoV (MOI = 10) for 3, 6, 9, or 12 h. Cellular samples were collected and subjected to RNA extraction and quantitative real-time RT-PCR analysis for detecting XBP1s (A), ATF4 (D), CHOP (E), and GADD34 (F) mRNA and to western blot analysis for detecting GRP78, GRP94 (B), p-eIF2 $\alpha$ , total eIF2 $\alpha$  (C), PDCoV N, and  $\beta$ -actin. Target protein expression was quantitatively estimated by ImageJ software and presented as the density value relative to that of the  $\beta$ -actin. The presented results are the means and standard deviations of data from three independent experiments. \* $p < 0.05$ ; \*\* $p < 0.01$ ; \*\*\* $p < 0.001$ ; \*\*\*\* $p < 0.0001$ ; ns, nonsignificant difference.
