# Supplementary material
Source: PubMed Central journal article supplement (PMC9192130)
Supplement: mmc2.pdf [file mmc2.pdf]

## Supplemental Figure S2

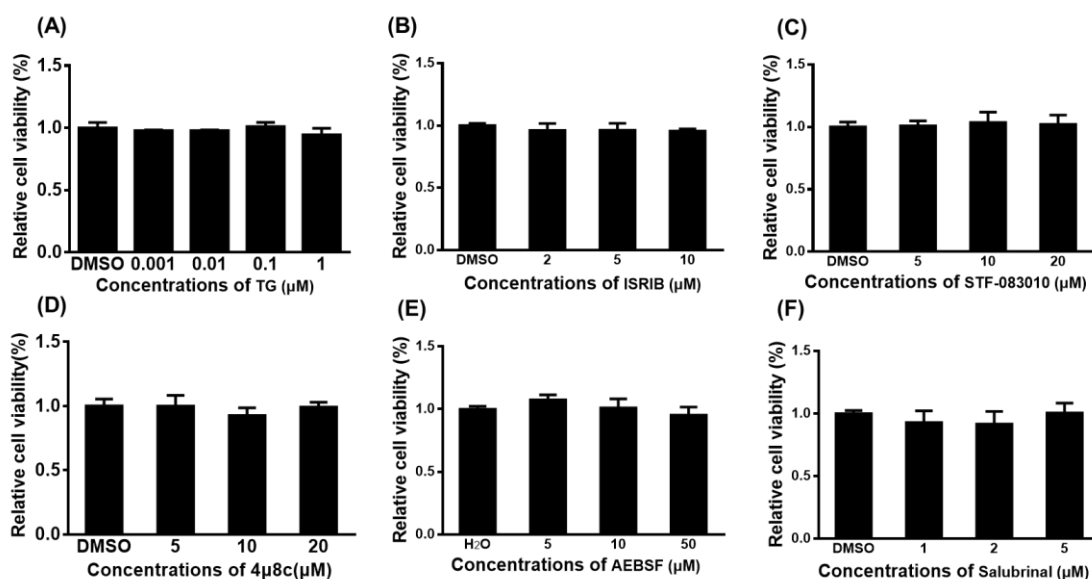

**Figure S2. CCK-8-based cell viability assay results for cells treated with different pharmaceutical inhibitors.** (A–F) LLC-PK1 cells were treated with different concentrations of pharmaceutical inhibitors (TG, ISRIB, STF-083010, 4μ8c, AEBSF, or Salubrinal), or with DMSO or H<sub>2</sub>O as controls, for 12 h. The cell viability of these cells was then measured with a CCK-8-based cell viability assay conducted in accordance with the manufacturer’s protocol. Representative data from three independently conducted experiments are expressed as the relative cell viability with normalization to that of the control group.
